# Supplementary material for: Chemical fingerprinting of hydrocarbon-contamination in soil
Source: Royal Society of Chemistry journal article supplement (doi:10.1039/c3em00631j), 2015-01-01

Supplementary Data: Figure S1

Figure S1 Cross plots of LMW to HMW (LMW/HMW), anthracene to the sum of anthracene and phenanthrene ( $\text{Ant}/(\text{Ant} + \text{Phe})$ ), and benz[a]anthracene to the sum of benz[a]anthracene and chrysene ( $\text{BaA}/(\text{BaA} + \text{CRY})$ ) against fluoranthene to the sum of fluoranthene and pyrene ( $\text{FLR}/(\text{FLR} + \text{PYR})$ ). Soils samples are labeled by numbers (see Table S2 for specification).

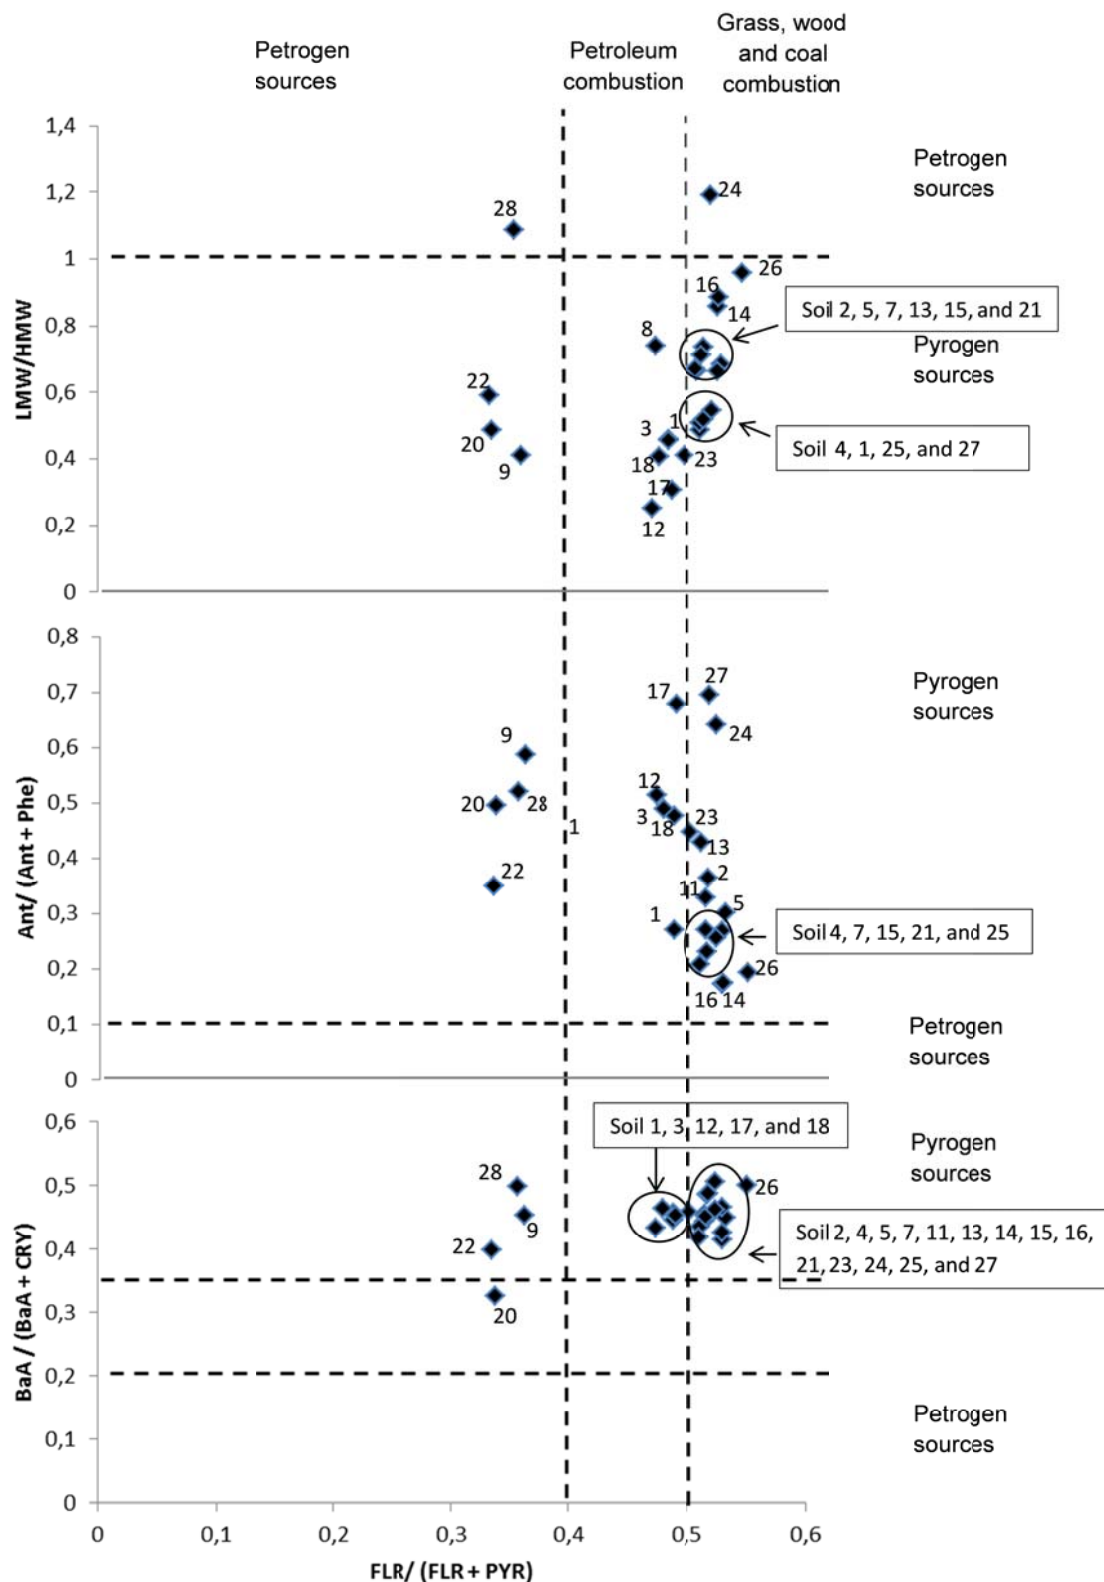

Supplement: c3em00631j1.pdf [file c3em00631j1.pdf]
