# Supplementary material for: Chemical fingerprinting of hydrocarbon-contamination in soil
Source: Royal Society of Chemistry journal article supplement (doi:10.1039/c3em00631j), 2015-01-01

Supplementary Data: Figure S2. GC-FID chromatograms of the 29 soils.

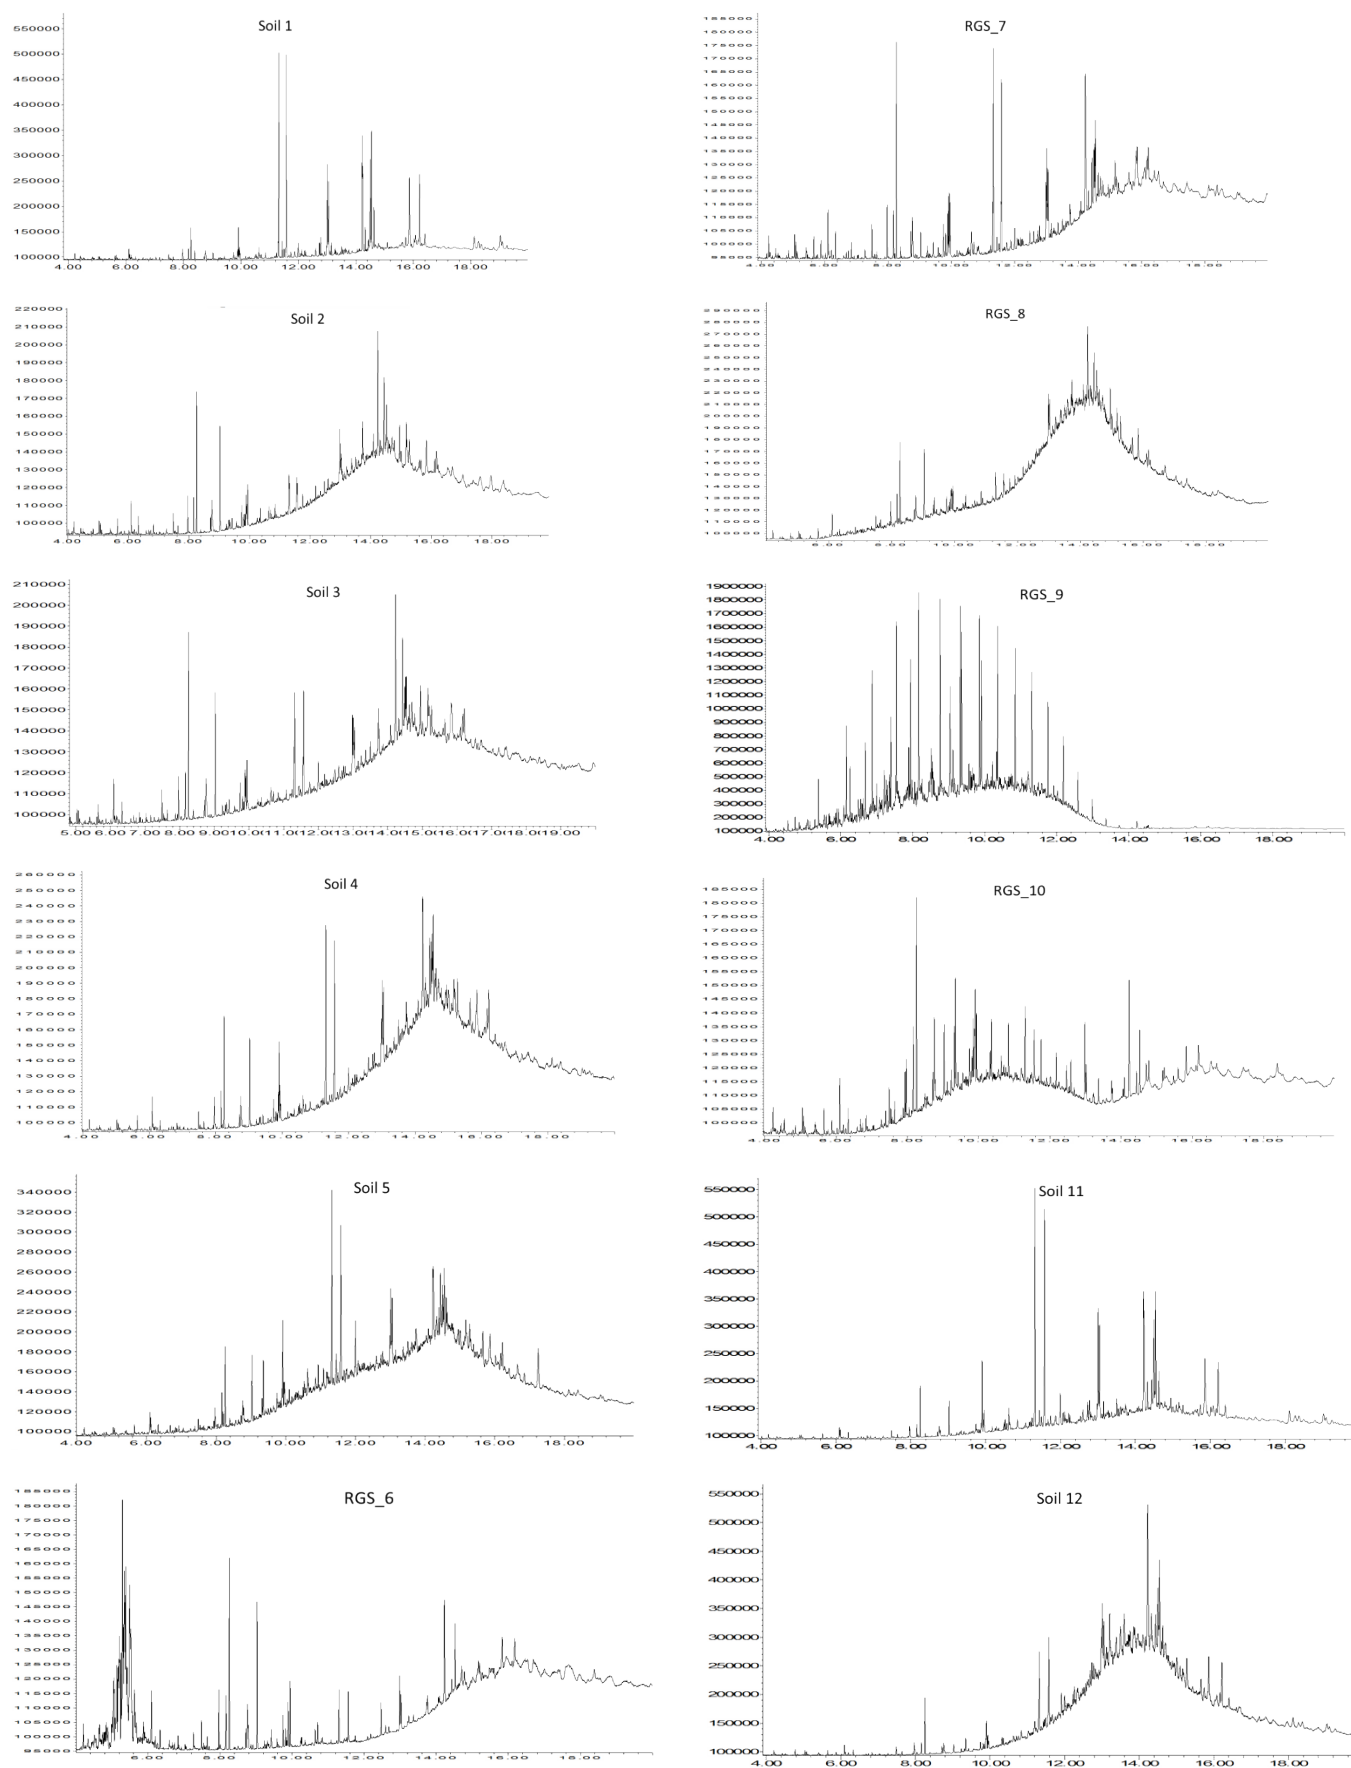

Supplementary Data: Figure S2. GC-FID chromatograms of the 29 soils.

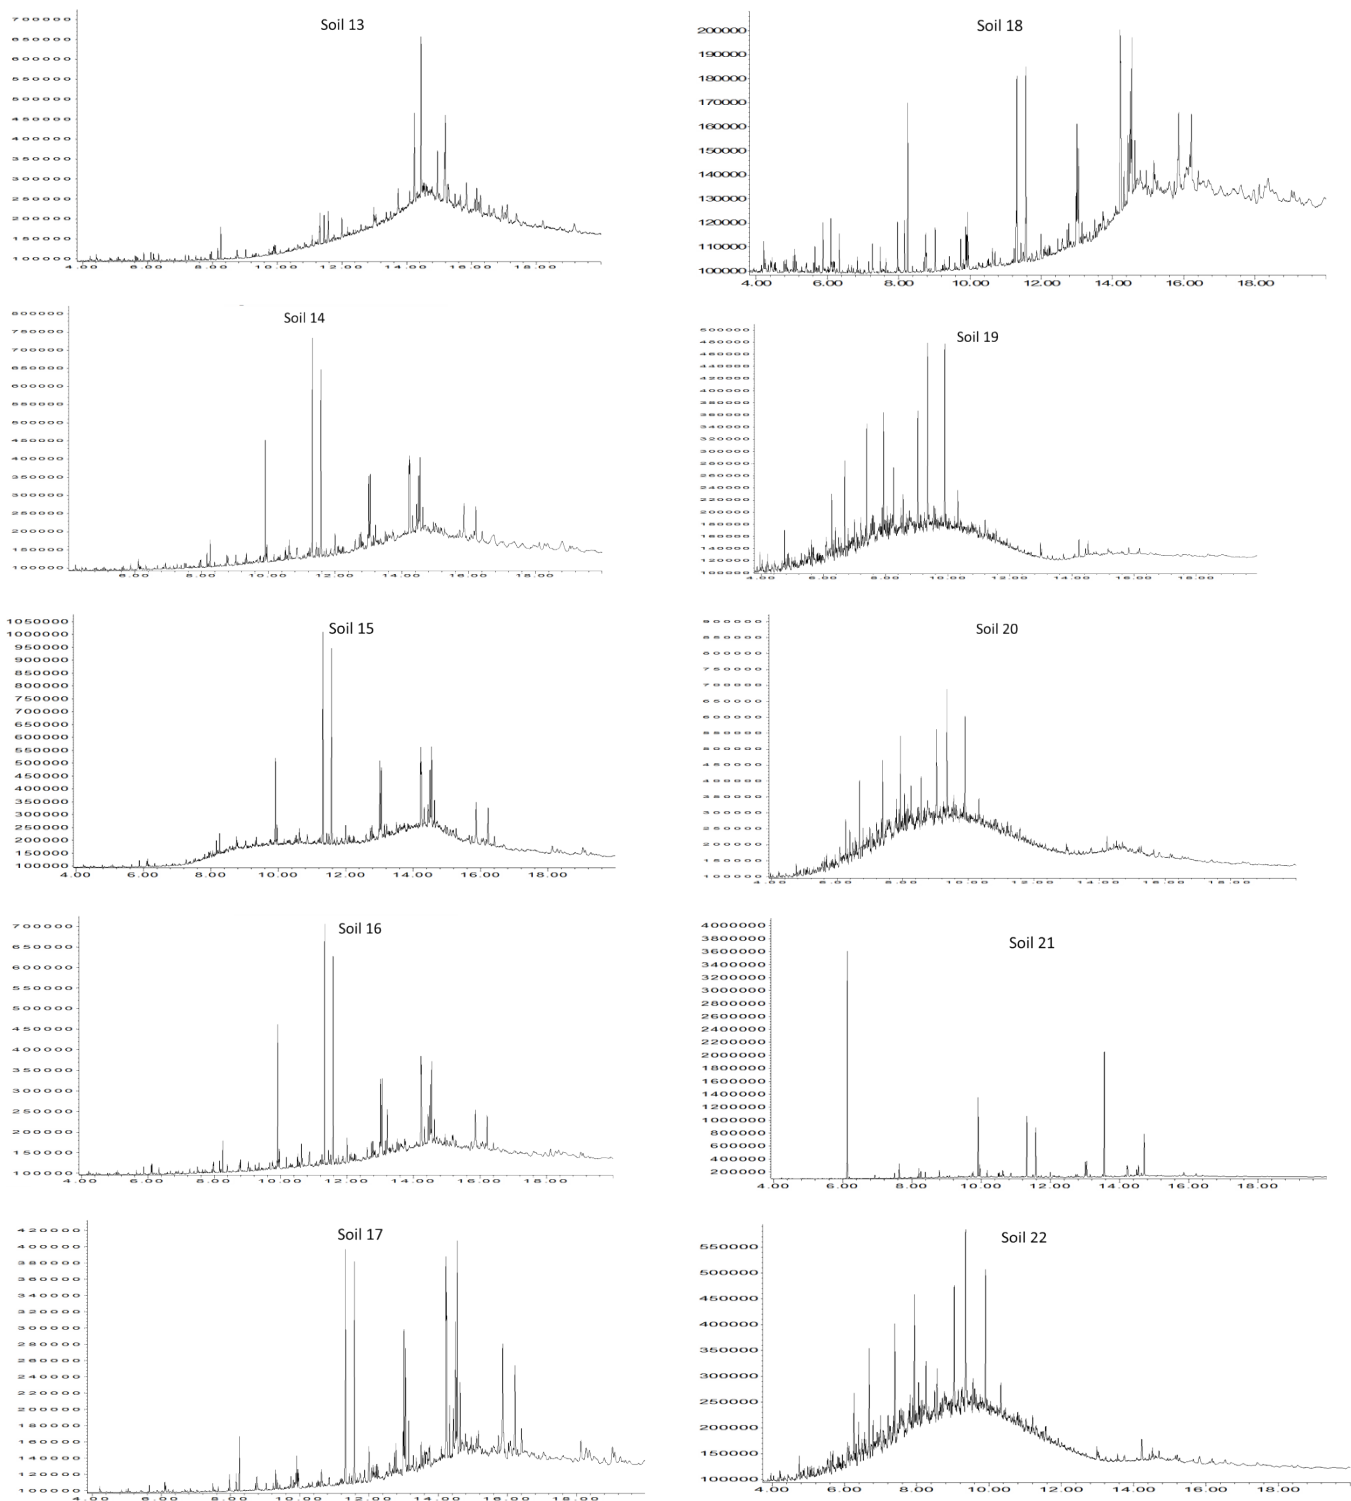

Supplementary Data: Figure S2. GC-FID chromatograms of the 29 soils.

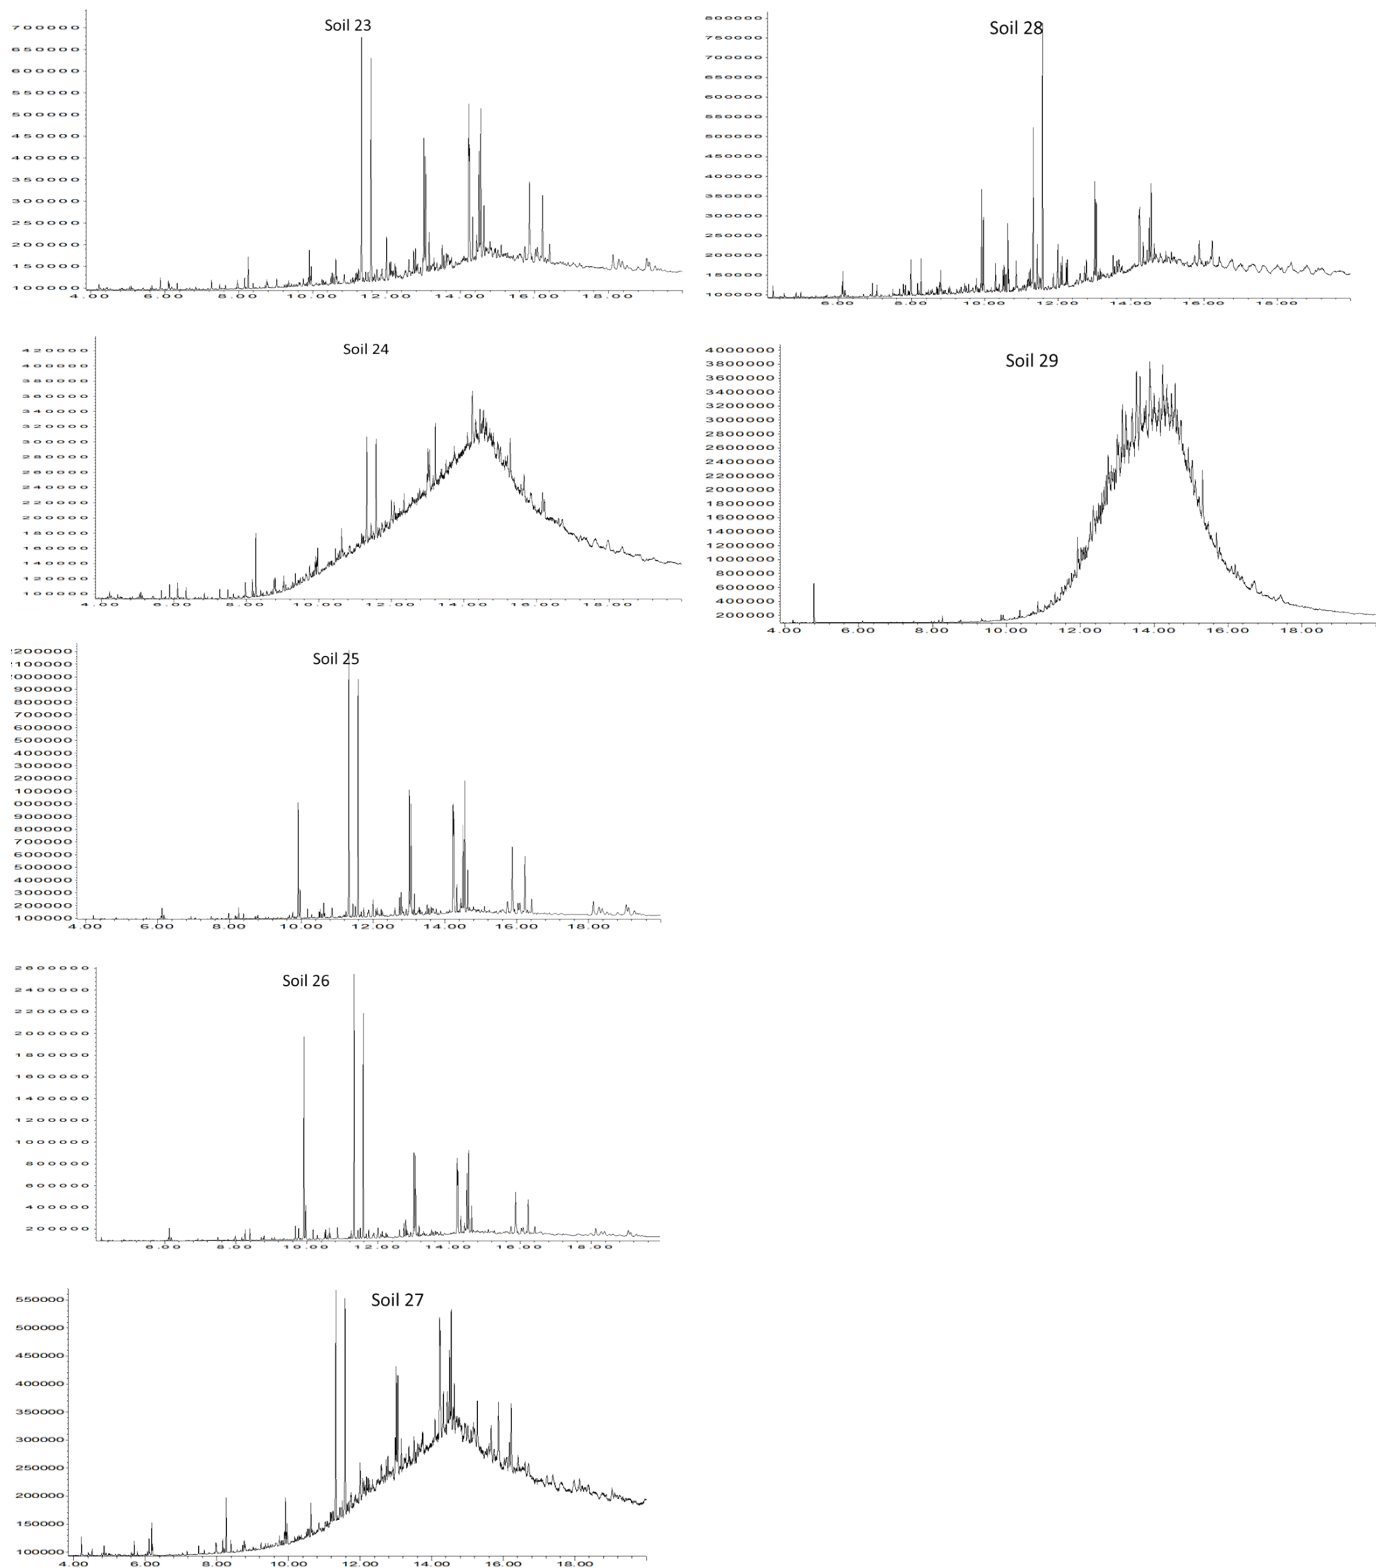

Supplement: c3em00631j2.pdf [file c3em00631j2.pdf]
